# Supplementary material for: Multifunctionalizing the marine diatom Phaeodactylum tricornutum for sustainable co-production of omega-3 long chain polyunsaturated fatty acids and recombinant phytase
Source: PubMed Central journal article supplement (PMC6686013; doi:10.1038/s41598-019-47875-1), 2019-08-07
Supplement: 41598_2019_47875_MOESM1_ESM.pdf [file 41598_2019_47875_MOESM1_ESM.pdf]

## Supplementary Data Information

**Multifunctionilizing the marine diatom *Phaeodactylum tricornutum* for sustainable co-production of omega-3 long chain polyunsaturated fatty acids and recombinant phytase**

*Alex Pudney<sup>1</sup>, Chiara Gandini<sup>2</sup>, Chloe K. Economou<sup>3</sup>, Richard Smith<sup>2</sup>, Paul Goddard<sup>4</sup>, Johnathan A. Napier<sup>2</sup>, Andrew Spicer<sup>1</sup> and Olga Sayanova<sup>2\*</sup>*

\*Author for correspondence - [olga.sayanova@rothamsted.ac.uk](mailto:olga.sayanova@rothamsted.ac.uk)

Supplementary Figure S1. Plasmid map of the expression vector Pt\_EF2\_Elo5.

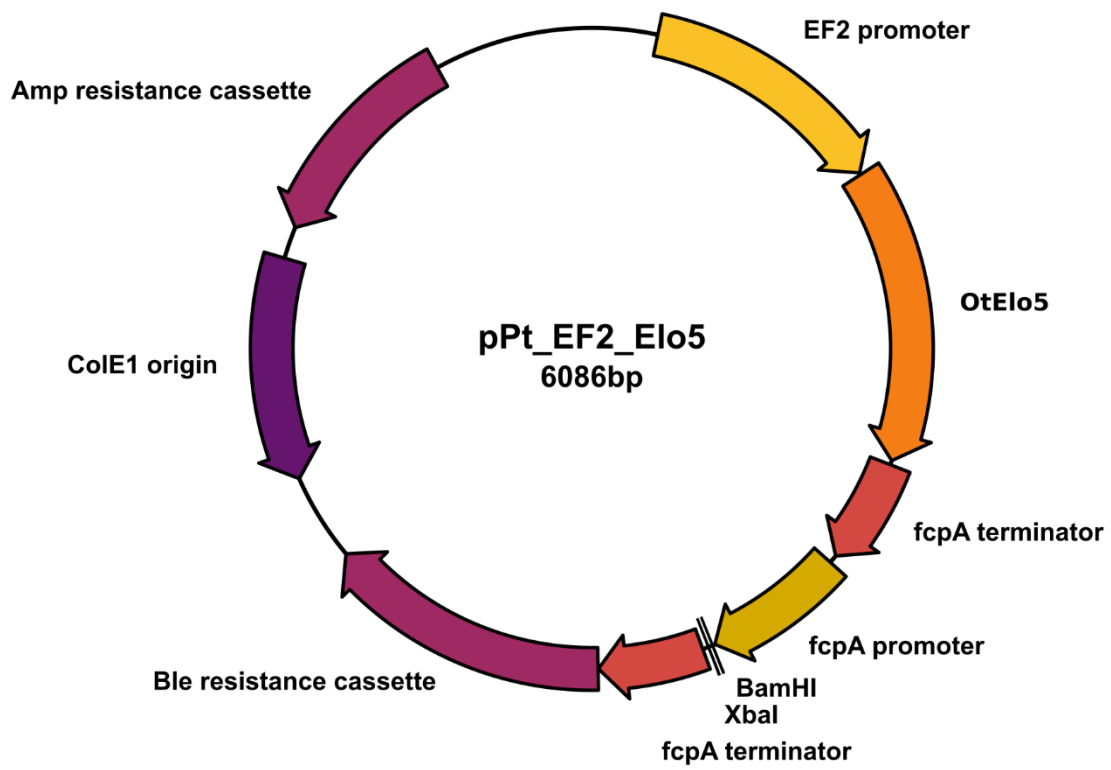

**Supplementary Figure S2. Lysis of *P. tricornutum* cells by sonication. (a) *P. tricornutum* cells before sonication. (b) Visualization of cellular debris after sonication. Scale bar: 50 $\mu$ M.**

**a**

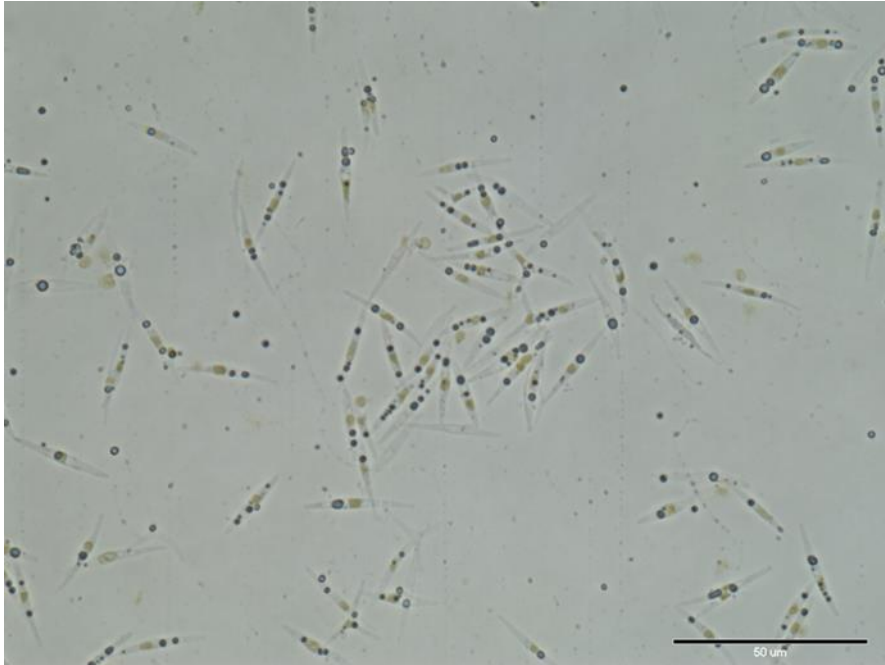

**b**

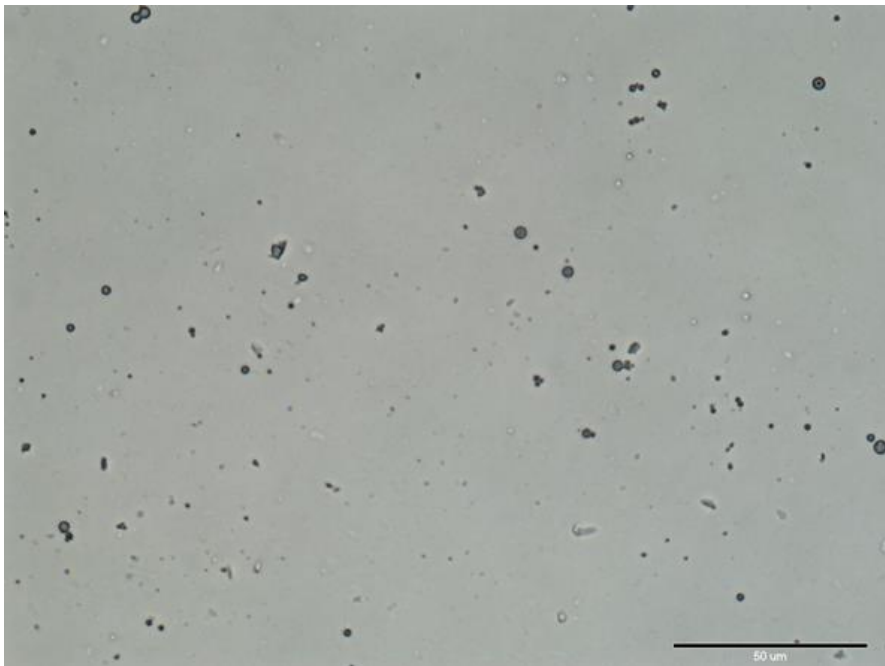



**Supplementary Figure S4. Cellular growth of WT and transgenic *P. tricornutum* strains.** Values are averages of measurements of three independent cultures,  $\pm$  standard error.

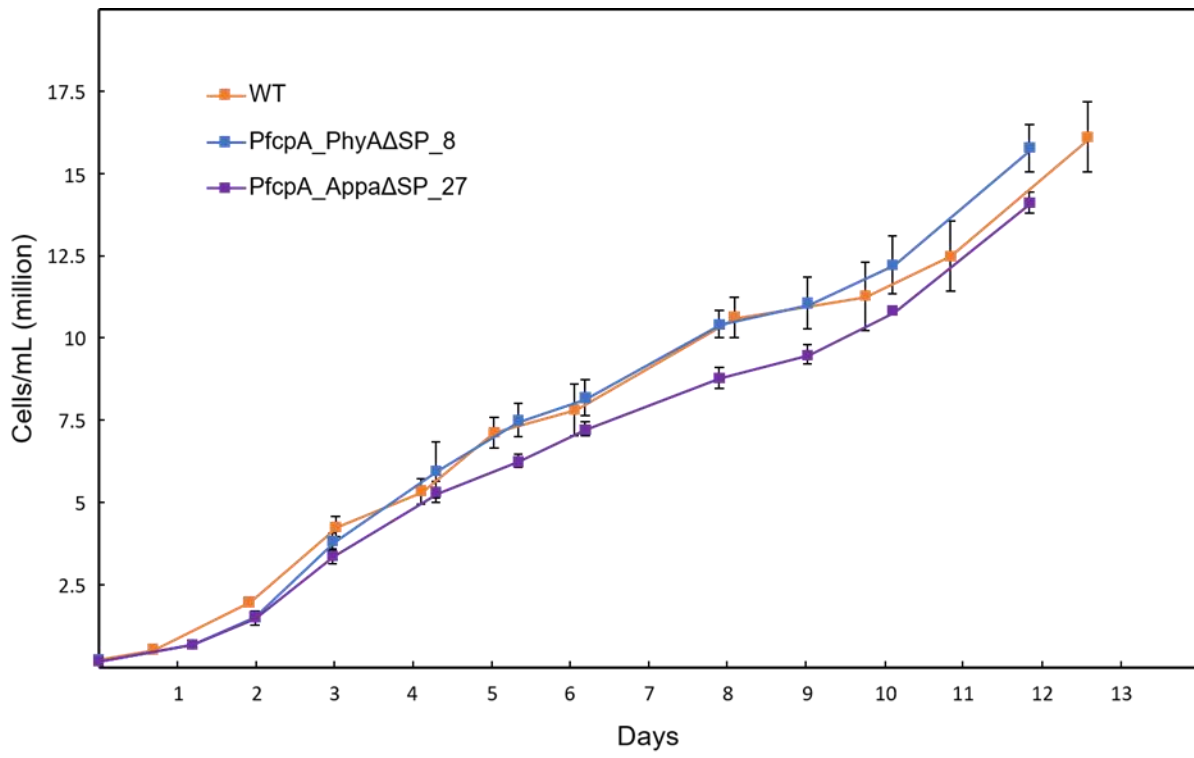

**Supplementary Table 1. Fatty acid composition and phytase activities of WT and selected transgenic*****P. tricornutum* strains.** Values are averages of measurements of at least three independent cultures,

± standard error; ND: not detected; FTU/mg soluble protein.

| Construct        | FTU/mg      | EPA (mole %) | DPA (mole %) | DHA (mole %) |
|------------------|-------------|--------------|--------------|--------------|
| WT               | 3.13 ±0.36  | 38.64 ±1.35  | ND           | 4.67 ±0.10   |
| Pt_EF2_Elo5      | ND          | 26.2 ±0.82   | 1.45 ±0.04   | 11.09 ±0.04  |
| PfcpA_appAΔSP_8  | 23.13 ±0.96 | 25.15 ±0.94  | 2.38 ±0.07   | 10.76 ±0.37  |
| PfcpA_appAΔSP_17 | 39.18 ±1.86 | 21.09 ±0.19  | 1.69 ±0.03   | 7.82 ±0.06   |
| PfcpA_appAΔSP_27 | 35.63 ±2.29 | 24.26 ±1.03  | 2.23 ±0.19   | 10.24 ±0.26  |
| PfcpA_appAΔSP_36 | 25.2 ±1.40  | 22.05 ±0.91  | 2.47 ±0.05   | 10.32 ±0.23  |
| PfcpA_phyAΔSP_8  | 40.2 ±1.22  | 18.97 ±5.62  | 1.9 ±0.19    | 8.37 ±2.47   |
| PfcpA_phyAΔSP_9  | 32.17 ±1.00 | 19.98 ±0.69  | 1.54 ±0.06   | 7.49 ±0.08   |
| PfcpA_phyAΔSP_17 | 31.59 ±0.61 | 20.8 ±0.20   | 2.14 ±0.05   | 9.65 ±0.05   |
| PfcpA_phyAΔSP_50 | 29.35 ±0.91 | 25.74 ±0.25  | 2.29 ±0.06   | 10.54 ±0.15  |

**Supplementary Table 2. The total soluble protein content of WT and transgenic PfcpA\_appAΔSP\_27 and PfcpA\_phyAΔSP\_9 strains.** Values are averages of measurements of at least three independent cultures, ± standard error.

|                  | Cells /mL              | Protein (mg /mL) | Protein (μg /mL) /10 <sup>7</sup> cells |
|------------------|------------------------|------------------|-----------------------------------------|
| WT               | 2.24 x 10 <sup>7</sup> | 2.48 ± 0.068     | 110 ± 3                                 |
| PfcpA_phyAΔSP_8  | 2.06 x 10 <sup>7</sup> | 2.15 ± 0.102     | 104 ± 2                                 |
| PfcpA_appAΔSP_27 | 2.28 x 10 <sup>7</sup> | 2.33 ± 0.125     | 102 ± 4                                 |
